# Supplementary material
Source: PubMed Central journal article supplement (PMC3063641)
Supplement: 11357_2010_9157_MOESM1_ESM.pdf [file 11357_2010_9157_MOESM1_ESM.pdf]

Table S1. Statistical analysis of enzyme activities as correlates of mass-specific metabolic rate.

| Enzyme Activity                  | Correlation ( $R^2$ )<br>(residuals of body<br>mass correlation) | Slope   | P-Value |
|----------------------------------|------------------------------------------------------------------|---------|---------|
| Liver 20S<br>Proteasome Activity | 0.0200                                                           | 0.2683  | >0.05   |
| Liver TrxR Activity              | 0.0243                                                           | 0.1306  | >0.05   |
| Liver Grx Activity               | 0.1374                                                           | -0.2568 | >0.05   |
